# Supplementary material
Source: MDPI journal article supplement (https://www.mdpi.com/2071-1050/10/4/990)
Supplement: s1 [file s1]

## Sheet: MRCUR (1)+(2)
Table S1. Mineral resource comprehensive utilization rate in China (2000-2015)
Time	Total recovery rate of mineral resources	Comprehensive utilization rate of associated mineral resources	Mineral resource comprehensive utilization rate (%)	Average growth rate
2000	0.3	0.2	27	0.03131
2001			27.8454
2002			28.7172
2003			29.6163
2004			30.5436
2005	0.3	0.35	31.5	0.0299
2006			32.4419
2007			33.4119
2008			34.4109
2009			35.4398
2010	0.35	0.4	36.5
2011			37.449	0.026
2012			38.4227
2013			39.4217
2014			40.4466
2015	0.4	0.45	41.5
Data sources:	The data of 2000, 2005, 2010 and 2015 were collected from research articles, NDRC report and the China Mining Yearbook 2008
	Here we assume that the mineral resource comprehensive utilizaton rate increased with the average growth rate in different periods

## Sheet: PRP (3)+(4)
Table 4. PRP in China from 2005 to 2015
Time	GDP constant price (100 million yuan RMB)	Total resource consumption (100 million tons)	Primary resource productivity (yuan RMB / ton)	Index of resource productivity (%)
	Calculation according to the 2005 price
2005	187319	49.4935	3784.72
2006	211148	55.8606	3779.9	99.8727
2007	241196	61.1274	3945.79	104.256
2008	264473	62.947	4201.52	111.013
2009	289330	67.9013	4261.04	112.585
2010	320103	75.1845	4257.56	112.493
Average of the 11th Five-year Plan period			4089.16
	Calculation according to the 2010 price
2010	413030	75.1845	5493.55
2011	452430	84.052	5382.74	97.9828		-0.0201717
2012	487976	84.5266	5773.05	105.088		0.0725112
2013	525835	89.043	5905.41	107.497	5687.07	0.0229277
2014	564194	87.393	6455.83	117.516		0.0932053
2015	603212	88.4202	6822.1	124.184		0.0567359
Average of the 12th Five-year Plan period			6067.83				1.48388
Data sources:	1. GDP, fossil fuel apparent consumption data and non-living resource import and export data came from China Statistical Yearbook. Iron and steel, non-ferrous metals, nonmetal import and export data came from the China Mineral Yearbook
	2. In this study, aluminum resource only includes bauxite, and sulfer resource only includes gypsum
	3. Limestone in this study includes 13 kinds of limestones, according to the China Mineral Yearbook. Tuff used to produce glass is not involved.
Table 3. Apparent consumption amount of major primary resources in China
Year	Coal	Petroleum	Natural gas	Iron and steel (here only iron ore is counted)	Non-ferrous metals	Nonmetal resource	Biomass resource	Total (10 thousand tons)	Total (100 million tons)
	Total consumption (10 thousand TCE)	Total consumption (10 thousand TCE)	Total consumption (10 thousand TCE)	Total consumption (10 thousand TCE)	Total consumption (10 thousand TCE)	Total consumption (10 thousand TCE)	Total consumption (10 thousand TCE)
2000	100670	32332.1	3233.21				43442.5
2001	105772	32976	3733.13	28901.7	13278.2	111799	43112.4	339572	33.9572
2002	116160	35611.2	3900.27	33549.5	12245.9	119506	42945.7	363919	36.3919
2003	138352	39613.7	4532.91	37748.9	10367.2	163778	40037.4	434431	43.4431
2004	161657	45825.9	5296.46	51881	14429.1	126358	46495.9	451944	45.1944
2005	189231	46523.7	6272.86	62520.9	12577.4	130228	47580.5	494935	49.4935
2006	207402	50131.7	7734.61	75066.1	15419.3	152155	50697.2	558606	55.8606
2007	225795	52945.1	9343.26	87924.8	19519.4	164647	51098.2	611274	61.1274
2008	229237	53542	10900.8	97863.7	19436.5	164189	54301.3	629470	62.947
2009	240666	55124.7	11764.4	108648	19097.7	189593	54118.2	679013	67.9013
2010	249568	62752.8	14425.9	129221	25154.3	213996	56726.8	751845	75.1845
2011	271704	65023.2	17804	156525	28761.4	241191	59511.5	840520	84.052
2012	275465	68363.5	19302.6	147252	32717.8	240043	62122.1	845266	84.5266
2013	280999	71292.1	22096.4	154494	37931.8	259585	64030.5	890430	89.043
2014	279329	74090.2	24270.9	161844	32956	236174	65266.3	873930	87.393
2015	273849	78672.6	25364.4	147722	32783.6	259056	66755	884202	88.4202
Used for tabulation
Table 4. PRP in China from 2005 to 2015
Time	GDP constant price (0.1 Billion yuan RMB)	Total resource consumption amount (0.1 Billion ton)	primary resource productivities (yuan RMB / ton)	Index of resource productivity (%)
	Calculated according to the 2005 price
2005	187319	49.4935	3784.72		the 11th Five-year Plan period	the 12th Five-year Plan period
2006	211148	55.8606	3779.9	99.8727
2007	241196	61.1274	3945.79	104.256
2008	264473	62.947	4201.52	111.013
2009	289330	67.9013	4261.04	112.585
2010	320103	75.1845	4257.56	112.493
2010	413030	75.1845	5493.55
2011	452430	84.052	5382.74	97.9828
2012	487976	84.5266	5773.05	105.088
2013	525835	89.043	5905.41	107.497
2014	564194	87.393	6455.83	117.516
2015	603212	88.4202	6822.1	124.184
	Figure 2. Annual changes of PRP in the two Five-year periods
	Figure 3. Annual changes of PRP Index in the two Five-year periods

## Sheet: Industrial solid waste(5)-1
Table 5. Comprehensive utilization of industrial solid waste from 2000 to 2015
Time	Generation amount of industrial solid waste (10 thousand tongs)	Amount of industrial solid waste comprehensive utilization (10 thousand tons)	Industrial solid waste comprehensive utilization rate (%)	Index of industrial solid waste comprehensive utilization rate (%)
2000年	81608	37451	45.9
2001年	88840	47290	52.1	113.508	0.135076
2002年	94509	50061	51.9	113.072	-0.00383877
2003年	100428	56040	54.8	119.39	0.0558767
2004年	120030	67796	55.7	121.351	0.0164234
2005年	134449	76993	56.1	122.222	0.00718133
2006年	151541	92601	60.2	107.308	0.0730838
2007年	175632	110311	62.1	110.695	0.0315615
2008年	190127	123482	64.3	114.617	0.0354267
2009年	203943	138186	67	119.43	0.0419907
2010年	240944	161772	66.7	118.895	-0.00447761
2011年	326204	196988	59.8	89.6552	-0.103448
2012年	332509	204467	60.9	91.3043	0.0183946
2013年	330859	207616	62.2	93.2534	0.0213465
2014年	329254	206392	62.1	93.1034	-0.00160772
2015年	331055	200857	60.2	90.2549	-0.0305958
Data source: China environmental statistical yearbook
Note:	1. The base year of comprehensive utilization index is set as: the year 2000 is the base year of 10th Five-year Plan period, the year 2005 is the base year of 11th Five-year Plan period, the year 2010 is the base year of 12th Five-year Plan period

## Sheet: Renewable resource recycle(5)-2
Table 6. Recycling of major renewable resources from 2008 to 2015
Year	Waste steel recycling rate	Waste non-ferrous metals recycling rate	Waste plastic recycling rate	Waste paper recycling rate	Discarded car recycling rate	Waste electric and electronic products recycling rate	Recycling rates of major renewable resource (%)	Index of major renewable resource recycling rate (%)
2008年	0.140342	0.0777691	0.24455	0.37219	0.0954878	0.227877	19.3036
2009年	0.133174	0.136302	0.275484	0.381813	0.0513363	0.257537	20.5941			0.0668523
2010年	0.130408	0.129767	0.270722	0.37579	0.0809568	0.202431	19.8346			-0.0368806
2011年	0.132792	0.132443	0.270416	0.394791	0.0643991	0.218191	20.2172	101.929		0.019291
2012年	0.116041	0.143361	0.300136	0.408158	0.0570652	0.114385	18.9858	93.909		-0.0609105
2013年	0.185454	0.150948	0.217097	0.386556	0.0610283	0.147068	19.1359	100.791		0.00790551
2014年	0.185211	0.165258	0.282134	0.374943	0.0539174	0.170679	20.5357	107.315		0.0731522
2015年	0.178895	0.169905	0.230543	0.411487	0.0693778	0.202675	21.048	102.495		0.0249496	0.0903684
	0.0385529	0.0921359	-0.0140071	0.0392968	-0.02611	-0.0252023
Data sources: Renewable resource data came from the China Renewable Resource Recovery Sector Development Report (2013-2015), the Anouncement of the Ministry of Commerce on the Medium and Long-term Plan of Renewable Resource Recovery System Construction (2015-2020), China Circular Economy Yearbook. All kinds of renewable resource output data originated from the annual data of Nationa Statistical B…
Note:	1. Since the recovery rate of waste electric and electronic products are difficult to calculate, and the 2010 waste tyre and discarded car data are not available, we didn't involve them in the renewable rsource recovery rate calculation
	2. Since the published waste iron and steel recovery data are mainly for the large scale iron and steel enterprises, started from 2014, medium and small iron and steel enterprises are involved in the statistics for their recovery of waste iron and steel, waste steel used in the foundry and forging industry
	3. Since the published waste non-ferrous metal recovery data before 2013 don't include the waste zinc zinc slag, zinc ash, flue dust and gas in marl, started from 2014,recovered waste zinc from waste zinc slag, zinc ash, flue dust and gas in marl are involved in the statistics
	4. Due to the availability of data, non-ferrous metal in this study includes 10 kinds of non-ferrous metals
	5. Recovery rate of major renewable resources = ∑recovery amount of major resources (waste iron and steel, ten kinds of waste non-ferrous metals, waste paper, waste plastic, discarded cars, waste electric and electronic products) / all these resources (iron and steel, non-ferrous metals, paper, plastic, cars, electric and electronic products) * 1/6 (all the weights are 1/6) * 100%
	6. Electric and electronic products includes color TV, microcomputer equipment, household washing machine, household refrigerator, room air conditioner
Table S2. Domestic recovery amount of renewable resource in China（2008-2015）
Year	Waste steel (10 thousand tons)	Waste non-ferrous metals (10 thousand tons)	Waste plastic (10 thousand tons)	Waste paper (10 thousand tons)	Actural recovery amount of discarded cars (10 thousand)	Waste elestric and electronic products (color TV, microcomputer equipment, household washing machine, household refrigerator, room air conditioner) (10 thousand)
2008	7060	196	900	3128	88.86	9670
2009	7620	361	1000	3423	70.82	12129
2010	8310	405	1200	3695	147.87	12317
2011	9100	455	1350	4347	118.6	16058
2012	8400	530	1600	4472	110	8264
2013	15080	666	1366.2	4377	135	11430
2014	15230	798	2000	4419	127.92	13583
2015	14380	876	1800	4832	170	15274
Data sources: The renewable resource data came from China Renewable Resource Recovery Sector Development Report (2013-2015), the Announcement of the Ministry of Commerce on the Medium and Long-term Plan of Construction of the Renewable Resource Recovery System (2015-2020), China Circular Economy Yearbook
Table S3. Output of six products in China（2008-2015）						Unit: 10 thousand tons
Year	Output of crude steel	Output of 10 non-ferrous metals	Output of primary plastic	Output of machine-made paper	Output of cars (10 thousand)	Waste elestric and electronic products (color TV, microcomputer equipment, household washing machine, household refrigerator, room air conditioner) (10 thousand)
2008	50305.8	2520.28	3680.23	8404.3	930.59	42435.1
2009	57218.2	2648.54	3629.97	8965.13	1379.53	47096.2
2010	63723	3120.98	4432.59	9832.63	1826.53	60845.4
2011	68528.3	3435.44	4992.31	11010.9	1841.64	73595.9
2012	72388.2	3696.97	5330.92	10956.5	1927.62	72247.1
2013	81313.9	4412.13	6293.03	11323.1	2212.09	77719.2
2014	82230.6	4828.81	7088.84	11785.8	2372.52	79582.3
2015	80382.5	5155.82	7807.66	11742.8	2450.35	75362
Data source: China Statistical Yearbook

## Sheet: Industrial water(5)-3
Table 7. Industrial water recycling rate from 2004 to 2015
Year	Industraial water recycling rate (%)	Reuse	New water	Index of industrial water recycling rate (%)
2004	80.2729	4183937	1028202
2005	83.6004	5670096	1112285
2006	82.1804	5535492	1200287	98.3015
2007	83.6577	6026048	1177176	100.069
2008	86.0195	6547258	1064104	102.894
2009	85.6376	6130645	1028179	102.437
2010	86.2608	6872928	1094686	103.182
2011	90.0136	6334101	702724	104.351
2012	88.9579	6913391	858143	103.127
2013	88.0171	6526517	888536	102.036
2014	88.8005	6930588	874086	102.944
2015	89.641	7160130	827433	103.919
Data source: China Environmental Statistical Yearbook (2004-2015)
Note:	1. The setting of the base year for the index of comprehensive utilization rate: Taking the years 2000, 2005 and 2010 as the base year of the 10th, 11th, and 12th Five-year Plan periods, respectively
	Figure 4. Industrial water recycling rates (2004-2015)

## Sheet: SRRR (5)+(6)
Table 8. Secondary resource recycling rate (SRRR)
Time	Industrial solid waste comprehensive utilization rate (%)	Renewable resource recycling rate (%)	Industrial water recycling rate (%)	Secondary resource recycling rate (%)
2000	45.9			45.9	Default treatment is made for the marked years. The 2004-2007 weights are adjusted to 0.9 and 0.1
2001	52.1			52.1
2002	51.9			51.9
2003	54.8			54.8
2004	55.7		80.2729	58.1573
2005	56.1		83.6004	58.85
2006	60.2		82.1804	62.398
2007	62.1		83.6577	64.2558
2008	64.3	19.3036	86.0195	55.145
2009	67	20.5941	85.6376	56.8057
2010	66.7	19.8346	86.2608	56.5525
2011	59.8	20.2172	90.0136	53.9679
2012	60.9	18.9858	88.9579	53.9373
2013	62.2	19.1359	88.0171	54.4442
2014	62.1	20.5357	88.8005	54.9708
2015	60.2	21.048	89.641	54.3426
Table S4. Index of secondary resource recycling rate（2011-2015）
Time	Index of industrial solid waste utilization rate (%)	Index of renewable resource recycling rate (%)	Index of industrial water recycling rate (%)	Index of secondary resource recycling rate (%)
2011	89.6552	101.929	104.351	96.2764
2012	91.3043	93.909	103.127	94.4502
2013	93.2534	100.791	102.036	97.2711
2014	93.1034	107.315	102.944	99.3351
2015	90.2549	102.495	103.919	96.6596

## Sheet: EE（7)+(8)
Table 9. Major industrial pollutant discharges and environmental efficiencies (EE) from 2000 to 2015
Time	GDP constant price (100 million yuan RMB)	Total discharge amount of major pollutants (10 thousand tons)	EE	Index of EE（%）
	Calculated according to the 2000 price
2000	100280	8883.7	11.2881
2001	108639	8431.4	12.8851	114.147
2002	118562	8011.2	14.7995	131.107
2003	130463	7632.7	17.0927	151.422
2004	143658	7488.89	19.1828	169.938
2005	160027	7861.78	20.3551	180.323
	Calculated according to the 2005 price				16.863
2005	187319	7861.78	23.8265
2006	211148	7357.63	28.6978	120.445
2007	241196	6864.14	35.1385	147.477
2008	264473	6036.97	43.8089	183.866
2009	289330	5695.91	50.7961	213.191
2010	320103	5319.39	60.1766	252.561
	Calculated according to the 2010 price				43.7236
2010	413030	5319.39	77.6462
2011	452430	6690.33	67.6244	87.093
2012	487976	6175.56	79.0173	101.766
2013	525835	6049.7	86.9192	111.943
2014	564194	6307.68	89.4456	115.196
2015	603212	5906.32	102.13	131.532	85.0273	8.04757
Data sources: These data are integrated from the China Environmental Statistical Yearbook and the China Statistical Yearbook
Note:	2000-2010 smoke and dust emission amount are obtained by the plus of the total smoke emission amount and total industrial dust emission amount data in the Environmental Statistical Yearbook
	Major pollutants include: Solid waste, COD and ammonia nitrogen in industrial wastewater, SO2, smoke and dust in waste industrial gas
	The setting of the base year of the environmental efficiency index: The years of 2000, 2005 and 2010 are set as the base years of 10th, 11th and 12th Five-year Plan periods, respectively
Table S5. Discharge amount of major pollutants (2000-2015)
Year	Emission amount of industrial solid waste (10 thousand tons)	Discharging amount of COD (10 thousand tons)	Discharging amount of ammonia nitrogen (10 thousand tons)	Emission amount of SO2 (10 thousand tons)	Emission amount of smoke and dust (10 thousand tons)	Total discharge amount (10 thousand tons)
2000	3186.2	1445		1995.1	2257.4	8883.7
2001	2893.8	1404.8	125.2	1947.2	2060.4	8431.4
2002	2635.2	1366.9	128.8	1926.6	1953.7	8011.2
2003	1940.9	1333.9	129.6	2158.5	2069.8	7632.7
2004	1762	1339.18	133.01	2254.9	1999.8	7488.89
2005	1654.7	1414.2	149.78	2549.4	2093.7	7861.78
2006	1302.1	1428.2	141.33	2588.8	1897.2	7357.63
2007	1196.7	1381.8	132.34	2468	1685.3	6864.14
2008	781.8	1320.7	126.97	2321	1486.5	6036.97
2009	710.5	1277.5	122.61	2214	1371.3	5695.91
2010	498.2	1238.1	120.29	2185	1277.8	5319.39
2011	433.3	2499.86	260.44	2217.91	1278.83	6690.33
2012	144.2	2424	253.59	2118	1235.77	6175.56
2013	129.3	2352.7	245.66	2043.9	1278.14	6049.7
2014	59.4	2294.6	238.53	1974.4	1740.75	6307.68
2015	55.8	2223.5	229.91	1859.1	1538.01	5906.32
Data sources: These data are integrated from the China Environmental Statistical Yearbook and the China Statistical Yearbook
Note:	2000-2010 smoke and dust emission amount are obtained by the plus of the total smoke emission amount and total industrial dust emission amount data in the Environmental Statistical Yearbook
	The 2000-2010 emission amount of nitrogen oxide are not available
	Figure 5. Changes of environmental efficiencies（EE） from 2000 to 2015

## Sheet: REE(9)
Table 10. Resource-environmental efficiency (REE) in China from 2001 to 2015
Time	Total amount of resource consumption (10 thousand tons)	Total amount of waste discharge (10 thousand tons)	Resource-environmental efficiency (%)
2000		8883.7
2001	339572	8431.4	97.5171	0.975171
2002	363919	8011.2	97.7986	0.977986
2003	434431	7632.7	98.2431	0.982431
2004	451944	7488.89	98.343	0.98343
2005	494935	7861.78	98.4116	0.984116
2006	558606	7357.63	98.6829	0.986829
2007	611274	6864.14	98.8771	0.988771
2008	629470	6036.97	99.0409	0.990409
2009	679013	5695.91	99.1611	0.991611
2010	751845	5319.39	99.2925	0.992925
2011	840520	6690.33	99.204	0.99204
2012	845266	6175.56	99.2694	0.992694
2013	890430	6049.7	99.3206	0.993206
2014	873930	6307.68	99.2782	0.992782
2015	884202	5906.32	99.332	0.99332
	Figure 6. Changes of Resource-environmental efficiency (REE) in China since 2001

## Sheet: CCD(10)
Table 11. Comprehensive circular degree (CCD) of China from 2001 to 2015
Time	Mineral resource comprehensive utilization rate (%)	Resource-environmental efficiency (%)	Secondary resource recycling rate (%)	Comprehensive legel of the circular degree of the economy (%)
2000	27		45.9
2001	27.8454	97.5171	52.1	59.1541	0.591541
2002	28.7172	97.7986	51.9	59.4719	0.594719
2003	29.6163	98.2431	54.8	60.8865	0.608865
2004	30.5436	98.343	58.1573	62.348	0.62348
2005	31.5	98.4116	58.85	62.9205	0.629205
2006	32.4419	98.6829	62.398	64.5076	0.645076
2007	33.4119	98.8771	64.2558	65.5149	0.655149
2008	34.4109	99.0409	55.145	62.8656	0.628656
2009	35.4398	99.1611	56.8057	63.8022	0.638022
2010	36.5	99.2925	56.5525	64.115	0.64115
2011	37.449	99.204	53.9679	63.5403	0.635403
2012	38.4227	99.2694	53.9373	63.8765	0.638765
2013	39.4217	99.3206	54.4442	64.3955	0.643955
2014	40.4466	99.2782	54.9708	64.8986	0.648986
2015	41.5	99.332	54.3426	65.0582	0.650582
	Figure 7. Changes of Comprehensive circular degree (CCD) of China from 2001 to 2015
